# Supplementary material for: Growth of Candidate Phyla Radiation bacteria in groundwater incubations reveals widespread adaptations to oxic conditions
Source: Research Square preprint supplement (doi:10.21203/rs.3.rs-6428740/v1), 2025-05-20
Supplement: Supplementary file 2 [file 6f960955f2acb29d3395b753.xlsx]

## Sheet: TableS1
Table S1: Overview of samples from groundwater incubation experiments
Treatment	Wells	Oxygen	Supplement	#Samples	Incubation time	Reference	Accession
Auto	H52	Anoxic	200 µM Ammonium + 120µM Nitrate + 50 µM Nitrite	21	up to 1006 days	this study	PRJNA1227287
Auto	H52	Anoxic	200 µM Ammonium + 2.5 mM Thiosulfate + 2.5 mM Nitrate	21	up to 1006 days	this study	PRJNA1227287
Auto	H41	Oxic	200 µM Ammonium	21	up to 1006 days	this study	PRJNA1227287
Auto	H41	Oxic	15 µM Ammonium + 2.5 mM Thiosulfate	20	up to 1006 days	this study	PRJNA1227287
Auto	H41	Oxic	15 µM Ammonium + 2.5 mM Thiosulfate, 12C or 13C-bicarbonate	19	21, 43 and 70 days	Taubert et al. 2022	PRJNA633367
Auto	H52	Anoxic	200 µM Ammonium + 2.5 mM Thiosulfate + 200 µM Nitrate, 12C or 13C-bicarbonate	36	7, 21 and 42 days	Heinze et al. 2023	PRJNA962518
start	H52	Anoxic	none	6	NA	Heinze et al. 2023	PRJNA962518
Auto	H53	Anoxic	200 µM Ammonium + 2.5 mM Thiosulfate + 2.5 mM Nitrate, 12C or 13C-bicarbonate	12	7 days, 41 days	this study	PRJNA1227287
Auto	H52	Anoxic	200 µM Ammonium + 2.5 mM Thiosulfate + 200 µM Nitrate	11	7 days, 14 days	this study	PRJNA1227287
start	H52	Anoxic	none	3	NA	this study	PRJNA1227287
Complex	H41	Oxic	1.1% R2A + 2.00E+08 Pseudomonas cells	8	50 days	this study	PRJNA1227287
start	H41	Oxic	none	5	NA	this study	PRJNA1227287
Complex	H41	Oxic	5 ml soil seepage to 67 ml total (filter with biomass from 220 L GW)	12	21 days, 28 days	this study	PRJNA1227287
Complex	H41	Oxic	biomass from 220 L GW	6	21 days	this study	PRJNA1227287
Methylo	H41	Oxic	2 mM Methylamine	105	up to 657 days	this study	PRJNA1227287
Methylo	H41	Oxic	1 mM Methanol (12C or 13C)	12	7 days, 39 days	this study	PRJNA1227287
Methylo	H41	Oxic	2 mM Methylamine (12C or 13C)	6	14 days	this study	PRJNA1227287
start	H41	Oxic	none	3	NA	Geesink et al. 2022	PRJEB46919
Complex	H41	Oxic	Necromass from 2.00E+08 Pseudomonas sp. cells per liter	18	2, 4 and 8 days	Geesink et al. 2022	PRJEB46919
Defined	H41	Oxic	1 mM D6-Veratric acid (filter with biomass from 580 L GW)	2	26 days	Taubert et al. 2018	PRJNA357979
Defined	H41	Oxic	1 mM Veratric acid (filter with biomass from 580 L GW), 30% D2O or H2O	4	26 days	Taubert et al. 2018	PRJNA357979
Methylo	H41	Oxic	4 mM Methylamine (biomass from 580 L GW), 30% D2O or H2O	4	42 days	Taubert et al. 2018	PRJNA357979
Complex	H41	Oxic	biomass from 580 L GW, 30% D2O or H2O	2	42 days	Taubert et al. 2018	PRJNA357979
Auto	H52	Anoxic	5 mM Thiosulfate + 200 µM Ammonium, biomass from 5 L GW	6	18 days	this study	PRJNA1227287
Auto	H52	Anoxic	5 mM Thiosulfate + 200 µM Ammonium	3	18 days	this study	PRJNA1227287
Auto	H41	Oxic	5 mM Thiosulfate + 200 µM Ammonium, biomass from 5 L GW	6	18 days	this study	PRJNA1227287
Auto	H41	Oxic	5 mM Thiosulfate + 200 µM Ammonium	3	18 days	this study	PRJNA1227287
Defined	H41	Oxic	1.25 mg/mL Cellulose-Hemicellulose(1:1) Mixture	6	70 days	Taubert et al. 2019	PRJNA422383
Defined	H41	Oxic	1.25 mg/mL Starch	7	70 days	Taubert et al. 2019	PRJNA422383
Complex	H41	Oxic	Leaf leachate (10 mL to 1000 mL added to groundwater to a total of 10 L)	6	600 days	this study	PRJNA1227287
Complex	H41	Oxic	Leaf leachate (control without addition)	2	600 days	this study	PRJNA1227287
Abbreviations:
Start – Start of the incubation
None – Without additional supplement
NA – Not applicable

## Sheet: TableS2
Table S2: Presence of oxygen-dependent genes in CPR MAGs
						ABY1		Gracilibacteria		Microgenomatia		Paceibacteria		Saccharimonadia		Berkelbacteria
Kegg Number	Gene	Gene product	EC	Metabolism	Category	# MAGs	Percentage	# MAGs	Percentage	# MAGs	Percentage	# MAGs	Percentage	# MAGs	Percentage	# MAGs	Percentage
K00273	DAO, aao	D-amino-acid oxidase	1.4.3.3	Amino acid metabolism_00260 Glycine, serine and threonine metabolism	Amino	0	0	0	0	1	0.0116279	0	0	0	0	0	0
K00278	nadB	L-aspartate oxidase	1.4.3.16	Amino acid metabolism_00250 Alanine, aspartate and glutamate metabolism	Amino	0	0	5	0.294118	3	0.0348837	0	0	0	0	0	0
K00457	HPD, hppD	4-hydroxyphenylpyruvate dioxygenase	1.13.11.27	Amino acid metabolism_00350 Tyrosine metabolism	Amino	0	0	0	0	0	0	1	0.00268817	0	0	0	0
K00486	KMO	kynurenine 3-monooxygenase	1.14.13.9	Amino acid metabolism_00380 Tryptophan metabolism	Amino	0	0	0	0	1	0.0116279	2	0.00537634	0	0	0	0
K00544	BHMT	betaine-homocysteine S-methyltransferase	2.1.1.5	Amino acid metabolism_00260 Glycine, serine and threonine metabolism	Amino	0	0	0	0	1	0.0116279	0	0	0	0	0	0
K00812	aspB	aspartate aminotransferase	2.6.1.1	Amino acid metabolism_00220 Arginine biosynthesis	Amino	2	0.0253165	0	0	10	0.116279	0	0	0	0	0	0
K01426	amiE	amidase	3.5.1.4	Amino acid metabolism_00330 Arginine and proline metabolism	Amino	5	0.0632911	0	0	4	0.0465116	20	0.0537634	0	0	0	0
K01692	paaF, echA	enoyl-CoA hydratase	4.2.1.17	Amino acid metabolism_00280 Valine, leucine and isoleucine degradation	Amino	0	0	0	0	0	0	1	0.00268817	0	0	0	0
K07130	kynB	arylformamidase	3.5.1.9	Amino acid metabolism_00380 Tryptophan metabolism	Amino	3	0.0379747	3	0.176471	2	0.0232558	11	0.0295699	5	0.454545	0	0
K09471	puuB, ordL	gamma-glutamylputrescine oxidase	1.4.3.-	Amino acid metabolism_00330 Arginine and proline metabolism	Amino	0	0	0	0	0	0	1	0.00268817	0	0	0	0
K01091	gph	phosphoglycolate phosphatase	3.1.3.18	Carbohydrate metabolism_00630 Glyoxylate and dicarboxylate metabolism	Carbohydrate	7	0.0886076	2	0.117647	8	0.0930233	13	0.0349462	4	0.363636	0	0
K01601	rbcL, cbbL	ribulose-bisphosphate carboxylase large chain	4.1.1.39	Carbohydrate metabolism_00710 Carbon fixation by Calvin cycle	Carbohydrate	2	0.0253165	0	0	2	0.0232558	0	0	0	0	0	0
K03821	phaC, phbC	poly[(R)-3-hydroxyalkanoate] polymerase subunit PhaC	2.3.1.304	Carbohydrate metabolism_00650 Butanoate metabolism	Carbohydrate	0	0	0	0	0	0	1	0.00268817	0	0	0	0
K05349	bglX	beta-glucosidase	3.2.1.21	Carbohydrate metabolism_00500_Starch and sucrose metabolism	Carbohydrate	3	0.0379747	0	0	0	0	4	0.0107527	1	0.0909091	0	0
K05350	bglB	beta-glucosidase	3.2.1.21	Carbohydrate metabolism_00500_Starch and sucrose metabolism	Carbohydrate	0	0	0	0	1	0.0116279	0	0	0	0	0	0
K02847	waaL, rfaL	O-antigen ligase	2.4.99.26	Glycan biosynthesis and metabolism_00540 Lipopolysaccharide biosynthesis	LPS	4	0.0506329	2	0.117647	0	0	13	0.0349462	0	0	0	0
K11936	pgaC, icaA	poly-beta-1,6-N-acetyl-D-glucosamine synthase	2.4.1.-	Glycan biosynthesis and metabolism_00543 Exopolysaccharide biosynthesis	LPS	0	0	0	0	4	0.0465116	73	0.196237	2	0.181818	1	0.0833333
K12983	waaV	UDP-glucose:(glucosyl)LPS beta-1,3-glucosyltransferase	2.4.1.-	Glycan biosynthesis and metabolism_00540 Lipopolysaccharide biosynthesis	LPS	0	0	0	0	0	0	2	0.00537634	0	0	0	0
K12990	rfbF, rhlC	rhamnosyltransferase	2.4.1.-	01005 Lipopolysaccharide biosynthesis proteins	LPS	2	0.0253165	0	0	0	0	0	0	0	0	0	0
K12992	rfbN, wbaN	O-antigen biosynthesis alpha-1,3-rhamnosyltransferase	2.4.1.377	01005 Lipopolysaccharide biosynthesis proteins	LPS	1	0.0126582	0	0	0	0	4	0.0107527	0	0	0	0
K14340	K14340	mannosyltransferase	2.4.1.-	Glycan biosynthesis and metabolism_00571 Lipoarabinomannan (LAM) biosynthesis	LPS	8	0.101266	0	0	54	0.627907	9	0.0241935	0	0	1	0.0833333
K07104	catE	catechol 2,3-dioxygenase	1.13.11.2	Xenobiotics biodegradation and metabolism_00361 Chlorocyclohexane and chlorobenzene degradation	other	0	0	1	0.0588235	0	0	7	0.0188172	0	0	0	0
K14292	TGS1	trimethylguanosine synthase	2.1.1.-	Translation_03013 RNA transport	other	1	0.0126582	0	0	1	0.0116279	0	0	0	0	0	0
K22083	mgsC	methylamine---glutamate N-methyltransferase subunit C	2.1.1.21	Energy metabolism_00680 Methane metabolism	other	0	0	0	0	0	0	1	0.00268817	0	0	0	0
K00275	pdxH, PNPO	pyridoxamine 5'-phosphate oxidase	1.4.3.5	Metabolism of cofactors and vitamins_00750 Vitamin B6 metabolism	Secondary	1	0.0126582	0	0	1	0.0116279	2	0.00537634	1	0.0909091	0	0
K00588		caffeoyl-CoA O-methyltransferase	2.1.1.104	Biosynthesis of other secondary metabolites_00940 Phenylpropanoid biosynthesis_00941_Flavonoid biosynthesis	Secondary	1	0.0126582	2	0.117647	0	0	3	0.00806452	0	0	0	0
K01434	pac	penicillin G amidase	3.5.1.11	Biosynthesis of other secondary metabolites_00311 Penicillin and cephalosporin biosynthesis	Secondary	0	0	0	0	0	0	1	0.00268817	0	0	0	0
K17836	penP	beta-lactamase class A	3.5.2.6	Biosynthesis of other secondary metabolites_00311 Penicillin and cephalosporin biosynthesis	Secondary	3	0.0379747	3	0.176471	46	0.534884	24	0.0645161	5	0.454545	1	0.0833333
K00395	aprB	adenylylsulfate reductase, subunit B	1.8.99.2	Energy metabolism_00920 Sulfur metabolism	Sulfur	0	0	0	0	0	0	1	0.00268817	0	0	0	0
K00956	cysN	sulfate adenylyltransferase subunit 1	2.7.7.4	Energy metabolism_00920 Sulfur metabolism	Sulfur	0	0	0	0	0	0	1	0.00268817	0	0	0	0
K00957	cysD	sulfate adenylyltransferase subunit 2	2.7.7.4	Energy metabolism_00920 Sulfur metabolism	Sulfur	1	0.0126582	0	0	0	0	1	0.00268817	0	0	0	0
K00958	sat	sulfate adenylyltransferase	2.7.7.4	Energy metabolism_00920 Sulfur metabolism	Sulfur	1	0.0126582	0	0	1	0.0116279	2	0.00537634	0	0	0	0
K01082	cysQ, MET22, BPNT1	3'(2'), 5'-bisphosphate nucleotidase	3.1.3.7	Energy metabolism_00920 Sulfur metabolism	Sulfur	2	0.0253165	1	0.0588235	0	0	3	0.00806452	0	0	0	0
					Total MAGs	79		17		86		372		11		12

## Sheet: TableS3
Table S3: Genes significantly enriched in CPR with preference for oxic incubations
				ABY1		Gracilibacteria		Microgenomatia		Paceibacteria		Saccharimonadia		Berkelbacteria
Category	Genes	Function	Kegg Number	# MAGs	Percentage	# MAGs	Percentage	# MAGs	Percentage	# MAGs	Percentage	# MAGs	Percentage	# MAGs	Percentage
Amino Acid Related	argD|argG|argFI	Arginine biosynthesis	K00819, K00821, K05830, K00840,K01940	6	0.0759494	4	0.235294	14	0.162791	6	0.016129	3	0.272727	1	0.0833333
Amino Acid Related	GAMT	Creatine pathway	K00542	0	0	0	0	0	0	0	0	1	0.0909091	1	0.0833333
Amino Acid Related	ilvA|ilvC	Isoleucine biosynthesis	K17989 or K01754	1	0.0126582	1	0.0588235	5	0.0581395	4	0.0107527	4	0.363636	0	0
Amino Acid Related	patA	Lysine degradation	K09251	0	0	0	0	0	0	0	0	0	0	1	0.0833333
Amino Acid Related	pheA|pheB	Phenylalanine biosynthesis	K01850 or K04092 or K14170	0	0	0	0	0	0	0	0	1	0.0909091	0	0
Amino Acid Related	serC	Phosphoserine aminotransferase	K00831	2	0.0253165	0	0	2	0.0232558	4	0.0107527	5	0.454545	0	0
Amino Acid Related	metE	Methionine biosynthesis	K00549	1	0.0126582	0	0	2	0.0232558	4	0.0107527	1	0.0909091	0	0
Amino Acid Related	kynB	Tryptophan metabolism	K01432 or K14263 or K07130	4	0.0506329	4	0.235294	2	0.0232558	13	0.0349462	5	0.454545	0	0
Biogeochemical cycles	aclA	Arnon-Buchanan cycle	K15230	1	0.0126582	0	0	3	0.0348837	2	0.00537634	3	0.272727	0	0
Biogeochemical cycles	aclB	Arnon-Buchanan cycle	K15231	4	0.0506329	0	0	2	0.0232558	2	0.00537634	3	0.272727	0	0
Biogeochemical cycles	nirK/S	Denitrification, nitrite reductase	K00368 or K15864	2	0.0253165	4	0.235294	0	0	41	0.110215	3	0.272727	0	0
Biogeochemical cycles	dmkB	Iron cycling	NA	5	0.0632911	0	0	33	0.383721	30	0.0806452	5	0.454545	1	0.0833333
Biogeochemical cycles	ndh2	Iron cycling	NA	27	0.341772	7	0.411765	4	0.0465116	106	0.284946	10	0.909091	5	0.416667
Biogeochemical cycles	mmoB	Methane metabolism	K16160	1	0.0126582	0	0	1	0.0116279	2	0.00537634	1	0.0909091	0	0
Carbohydrate		Alpha-amylase	K01176, K05343, K07405	2	0.0253165	3	0.176471	1	0.0116279	31	0.0833333	4	0.363636	0	0
Carbohydrate	SGA1	Glucoamylase	K01178	1	0.0126582	3	0.176471	0	0	25	0.0672043	6	0.545455	0	0
Carbohydrate	gntZ	6-phosphogluconate dehydrogenase	K00033	3	0.0379747	9	0.529412	17	0.197674	33	0.0887097	4	0.363636	1	0.0833333
Carbohydrate	eno	Enolase	K01689	68	0.860759	14	0.823529	71	0.825581	166	0.446237	0	0	11	0.916667
Carbohydrate	fbp|glpX	Fructose-1,6-bisphosphatase	K03841 or K02446 or K11532 or K01086	2	0.0253165	8	0.470588	11	0.127907	7	0.0188172	3	0.272727	0	0
Carbohydrate	fbaA|fbaB	Fructose-bisphosphate aldolase	K01623 or K01624 or K11645 or K16305 or K16306	51	0.64557	10	0.588235	33	0.383721	276	0.741935	11	1	10	0.833333
Carbohydrate	pgi	Glucose-6-phosphate isomerase	K01810 or K06859 or K13810 or K15916	53	0.670886	13	0.764706	52	0.604651	165	0.443548	10	0.909091	10	0.833333
Carbohydrate	gap	Glyceraldehyde-3-phosphate dehydrogen.	K00134 or K00150	35	0.443038	13	0.764706	9	0.104651	17	0.0456989	9	0.818182	6	0.5
Carbohydrate	gpmAB|gpmI|apgM	Phosphoglycerate mutase	K01834 or K15633 or K15634 or K15635	69	0.873418	13	0.764706	66	0.767442	206	0.553763	1	0.0909091	11	0.916667
Carbohydrate	pyk	Pyruvate kinase	K00873 or K12406	58	0.734177	16	0.941176	8	0.0930233	96	0.258065	7	0.636364	1	0.0833333
Carbohydrate	tktA|tktB	Transketolase	K00615	52	0.658228	13	0.764706	49	0.569767	269	0.723118	11	1	7	0.583333
Carbohydrate	galT	Uridyl transferase	K00965	22	0.278481	0	0	34	0.395349	139	0.373656	0	0	10	0.833333
Others		Cholesterol biosynth., Delta24-sterol reductase	K09828	2	0.0253165	0	0	1	0.0116279	2	0.00537634	1	0.0909091	0	0
Others	cdsA	Phosphatidylethanolamine biosynth.	K00981	1	0.0126582	0	0	0	0	0	0	1	0.0909091	1	0.0833333
Others	tmk	Pyrimidine deoxyribonucleotide biosynth.	K00943	44	0.556962	12	0.705882	49	0.569767	186	0.5	9	0.818182	10	0.833333
Others	tcpJ	toxin coregulated pilus biosynth. protein J	K10966	33	0.417722	8	0.470588	37	0.430233	155	0.416667	10	0.909091	8	0.666667
Oxic Respiration	atpA	F-type ATPase	K02111	55	0.696203	12	0.705882	53	0.616279	128	0.344086	9	0.818182	2	0.166667
Oxic Respiration	atpD	F-type ATPase	K02112	52	0.658228	9	0.529412	53	0.616279	125	0.336022	10	0.909091	3	0.25
Oxic Respiration	cyoA	Cytochrome bo(3) ubiquinol oxidase	K02297	0	0	0	0	1	0.0116279	2	0.00537634	7	0.636364	0	0
Oxic Respiration	cyoB	Cytochrome bo(3) ubiquinol oxidase	K02298	0	0	0	0	1	0.0116279	2	0.00537634	4	0.363636	0	0
Oxic Respiration	cyoC	Cytochrome bo(3) ubiquinol oxidase	K02299	0	0	0	0	0	0	2	0.00537634	7	0.636364	0	0
Oxic Respiration	cyoD	Cytochrome bo(3) ubiquinol oxidase	K02300	0	0	0	0	1	0.0116279	2	0.00537634	7	0.636364	0	0
Oxic Respiration	qoxA	Quinol oxidase	K02826	0	0	0	0	1	0.0116279	0	0	4	0.363636	0	0
Various Cofactors	aveDEF	Avermectin biosynthesis	K14373,K14374,K14372	14	0.177215	3	0.176471	31	0.360465	79	0.212366	6	0.545455	4	0.333333
Various Cofactors	idi	C5 isoprenoid biosynthesis	K01823	9	0.113924	2	0.117647	33	0.383721	45	0.120968	5	0.454545	1	0.0833333
Various Cofactors	cobA|pduO	Cobalamin biosynthesis	K00798 or K19221	35	0.443038	13	0.764706	58	0.674419	174	0.467742	9	0.818182	8	0.666667
Various Cofactors	hemY	Heme biosynthesis	K00231	2	0.0253165	0	0	0	0	2	0.00537634	0	0	1	0.0833333
Various Cofactors	moaE	Molybdenum cofactor biosynthesis	K03635 or K21142	0	0	0	0	0	0	0	0	2	0.181818	0	0
Various Cofactors	nadD	NAD biosynthesis	K00969 or K06210	3	0.0379747	0	0	16	0.186047	7	0.0188172	4	0.363636	0	0
Various Cofactors	kynB	NAD biosynthesis	K07130	4	0.0506329	4	0.235294	16	0.186047	13	0.0349462	5	0.454545	0	0
Various Cofactors	fabG	Pimeloyl-ACP biosynthesis	K00059	4	0.0506329	2	0.117647	18	0.209302	47	0.126344	6	0.545455	2	0.166667
Various Cofactors	pdaD|speA|adiA	Arginine decarboxylase	K01583 or K01584 or K01585 or K02626	10	0.126582	1	0.0588235	2	0.0232558	46	0.123656	6	0.545455	0	0
Various Cofactors	rocF	Arginase	K01476	2	0.0253165	0	0	0	0	1	0.00268817	1	0.0909091	0	0
Various Cofactors	rosB	Roseoflavin biosynthesis	K22598	0	0	0	0	0	0	3	0.00806452	4	0.363636	0	0
